# Supplementary material
Source: Springer Nature journal article supplement (https://www.springermedizin.de/resource/supplementary/13569_2014_57_MOESM2_ESM.pdf/9676760)
Supplement: MOESM2 [file 9676760]

**a****Progression free survival**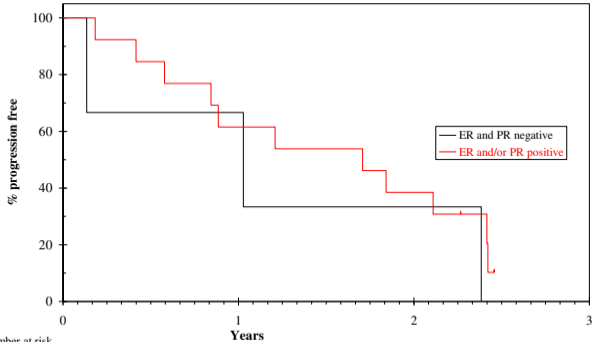

Number at risk

|                       | 0  | 1 | 2 | 3 |
|-----------------------|----|---|---|---|
| ER and PR negative    | 3  | 2 | 1 | 0 |
| ER and/or PR positive | 13 | 8 | 5 | 0 |

**b****Progression free survival**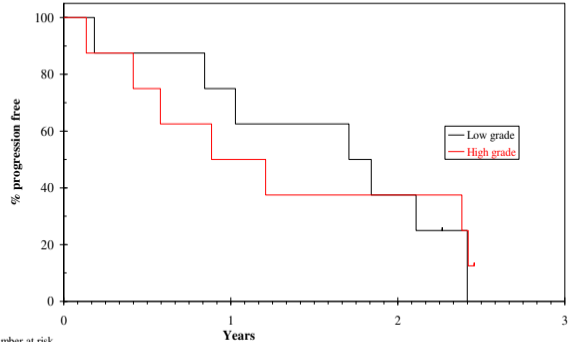

Number at risk

|            | 0 | 1 | 2 | 3 |
|------------|---|---|---|---|
| Low grade  | 8 | 6 | 3 | 0 |
| High grade | 8 | 4 | 3 | 0 |
